# Supplementary material
Source: PubMed Central journal article supplement (PMC3034417)
Supplement: supp_76.4.373_Table_e-1.pdf [file supp_76.4.373_Table_e-1.pdf]

| Table e-1.                |         |        |        |        |         |         |       |          |         |         |       |         |       |         |       |         |         |         |        |         |         |         |           |           |         |         |         |         |         |         |         |       |       |       |       |       |       |       |  |  |   |  |  |  |   |  |  |  |   |  |  |  |   |  |  |  |   |  |  |  |
|---------------------------|---------|--------|--------|--------|---------|---------|-------|----------|---------|---------|-------|---------|-------|---------|-------|---------|---------|---------|--------|---------|---------|---------|-----------|-----------|---------|---------|---------|---------|---------|---------|---------|-------|-------|-------|-------|-------|-------|-------|--|--|---|--|--|--|---|--|--|--|---|--|--|--|---|--|--|--|---|--|--|--|
| Family ID                 | CCA-184 |        |        |        | CCA-385 |         |       |          | CCA-386 | CCA-388 |       | CCA-389 |       | CCA-405 |       | CCA-436 | CCA-516 | CCA-523 |        | CCA-531 | CCA-532 | CCA-542 |           |           | CCA-543 | CCA-557 | CCA-572 | CCA-590 | CCA-611 | CCA-635 | CCA-636 |       |       |       |       |       |       |       |  |  |   |  |  |  |   |  |  |  |   |  |  |  |   |  |  |  |   |  |  |  |
| Family Data               |         |        |        |        |         |         |       |          |         |         |       |         |       |         |       |         |         |         |        |         |         |         |           |           |         |         |         |         |         |         |         |       |       |       |       |       |       |       |  |  |   |  |  |  |   |  |  |  |   |  |  |  |   |  |  |  |   |  |  |  |
| Age at MRI                | 18 yrs  | 14 yrs | 11 mo  | 2 mo   | 1yr     | 5 yrs   | 20 mo | 1 mo     | 14 mo   | 7 yrs   | 7 yrs | 2 yrs   | 4 yrs | 9 yrs   | 5 yrs | 3 yrs   | 2 yrs   | 4 yrs   | 16 yrs | 14 yrs  | 2 yrs   | 3 yrs   | 11 yrs    | 10 yrs    | 8 mo    | unk     | 5 yrs   | 1 mo    | 2 yrs   | 2 yrs   |         |       |       |       |       |       |       |       |  |  |   |  |  |  |   |  |  |  |   |  |  |  |   |  |  |  |   |  |  |  |
| Age at onset of seizures  | NA      | NA     | NA     | NA     | NA      | NA      | NA    | ?        | NA      | NA      | NA    | NA      | ?     | 18mos   | ?     | NA      | NA      | NA      | ?      | ?       | ?       | ?       | ?         | ?         | ?       | ?       | ?       | ?       | ?       | ?       |         |       |       |       |       |       |       |       |  |  |   |  |  |  |   |  |  |  |   |  |  |  |   |  |  |  |   |  |  |  |
| Age at onset of symptoms  | birth   | birth  | birth  | birth  | 3days   | birth   | NA    | birth    | 2years  | 8mos    | 8mos  | ?       | ?     | 18mos   | ?     | ?       | ?       | ?       | ?      | ?       | ?       | ?       | ?         | ?         | ?       | ?       | ?       | ?       | ?       | ?       |         |       |       |       |       |       |       |       |  |  |   |  |  |  |   |  |  |  |   |  |  |  |   |  |  |  |   |  |  |  |
| Consanguineous            | +       |        |        |        | +       |         |       |          | +       |         |       |         | +     |         |       |         | +       |         |        |         | +       |         |           |           | +       |         |         |         |         |         |         |       |       |       |       |       |       |       |  |  |   |  |  |  |   |  |  |  |   |  |  |  |   |  |  |  |   |  |  |  |
| Gender                    | M       | M      | M      | M      | M       | M       | M     | F        | F       | F       | M     | M       | F     | M       | M     | M       | F       | F       | F      | F       | M       | F       | F         | M         | F       | M       | M       | F       | M       | M       |         |       |       |       |       |       |       |       |  |  |   |  |  |  |   |  |  |  |   |  |  |  |   |  |  |  |   |  |  |  |
| Multiplex                 | +       |        |        |        | +       |         |       |          | +       |         |       |         | +     |         |       |         | +       |         |        |         | +       |         |           |           | +       |         |         |         |         |         |         |       |       |       |       |       |       |       |  |  |   |  |  |  |   |  |  |  |   |  |  |  |   |  |  |  |   |  |  |  |
| Number of affecteds       | 6       |        |        |        | 2       |         |       |          | 3       |         |       |         | 2     |         |       |         | 1       |         |        |         | 3       |         |           |           | 2       |         |         |         | 7       |         |         |       | 3     |       |       |       | 1     |       |  |  | 2 |  |  |  | 1 |  |  |  | 2 |  |  |  | 1 |  |  |  | 2 |  |  |  |
| Number Pts w/ MRIs        | 4       |        |        |        | 2       |         |       |          | 1       |         |       |         | 1     |         |       |         | 2       |         |        |         | 2       |         |           |           | 1       |         |         |         | 3       |         |         |       | 1     |       |       |       | 2     |       |  |  | 1 |  |  |  | 1 |  |  |  | 1 |  |  |  | 2 |  |  |  |   |  |  |  |
| Pt Pedigree ID            | IV-I-2  | IV-I-4 | IV-I-9 | IV-I-7 | IV-I-5  | IV-II-7 | IV-8  | II-III-2 | III-4   | III-1   | III-2 | III-2   | III-1 | IV-5    | IV-6  | IV-I-1  | IV-II-2 | III-4   | III-3  | III-5   | III-9   | V-I-3   | III-1     | III-2     | III-1   | III-2   | III-1   | III-2   | III-1   | III-1   | III-1   | III-1 | III-1 | III-1 | III-1 | III-1 | III-1 | III-1 |  |  |   |  |  |  |   |  |  |  |   |  |  |  |   |  |  |  |   |  |  |  |
| MRI Findings              |         |        |        |        |         |         |       |          |         |         |       |         |       |         |       |         |         |         |        |         |         |         |           |           |         |         |         |         |         |         |         |       |       |       |       |       |       |       |  |  |   |  |  |  |   |  |  |  |   |  |  |  |   |  |  |  |   |  |  |  |
| Anterior commissure       | +       |        |        |        |         |         |       |          |         |         |       |         |       |         |       |         |         |         |        |         |         |         |           |           |         |         |         |         |         |         |         |       |       |       |       |       |       |       |  |  |   |  |  |  |   |  |  |  |   |  |  |  |   |  |  |  |   |  |  |  |
| CCA Type                  | HwoD    | HwoD   | CAG    | APC    | HwoD    | HwoD    | KIN   | STR      | CAG     | STR     | STR   | APC     | STR   | KIN     | KIN   | KIN     | CAG     | KIN     | APC    | HwoD    | CAG     | ANR     | APC       | CAG       | ANR     | APC     | HwoD    | KIN     | STR     | STR     |         |       |       |       |       |       |       |       |  |  |   |  |  |  |   |  |  |  |   |  |  |  |   |  |  |  |   |  |  |  |
| Cerebellar affection      | -       | -      | -      | -      | + CVH   | + CVH   | -     | +        | +PanCA  | -       | -     | +       | -     | -       | -     | -       | + CVH   | + CVH   | -      | + CVH   | + CVH   | + CVH   | -         | + PCH     | + PCH   | + CVH   | -       | -       | -       | +PCH    | + PCH   |       |       |       |       |       |       |       |  |  |   |  |  |  |   |  |  |  |   |  |  |  |   |  |  |  |   |  |  |  |
| Colpocephaly              | -       | -      | -      | -      | -       | -       | -     | -        | -       | -       | -     | -       | -     | -       | -     | -       | -       | -       | -      | -       | -       | -       | -         | -         | -       | -       | -       | -       | -       | -       | -       |       |       |       |       |       |       |       |  |  |   |  |  |  |   |  |  |  |   |  |  |  |   |  |  |  |   |  |  |  |
| Cysts (CC or Cb)          | -       | -      | -      | -      | -       | -       | -     | -        | -       | -       | -     | -       | -     | -       | -     | -       | -       | -       | -      | -       | -       | -       | -         | -         | -       | -       | -       | -       | -       | -       | -       |       |       |       |       |       |       |       |  |  |   |  |  |  |   |  |  |  |   |  |  |  |   |  |  |  |   |  |  |  |
| GMH                       | -       | -      | -      | -      | -       | -       | -     | -        | -       | -       | -     | -       | -     | -       | -     | -       | -       | -       | -      | -       | -       | -       | -         | -         | -       | -       | -       | -       | -       | -       | -       |       |       |       |       |       |       |       |  |  |   |  |  |  |   |  |  |  |   |  |  |  |   |  |  |  |   |  |  |  |
| Ventriculomegaly          | +       | +      | +      | +      | +       | -       | -     | -        | -       | -       | -     | +       | -     | -       | -     | -       | -       | -       | -      | -       | -       | -       | -         | -         | -       | -       | -       | -       | -       | -       | -       |       |       |       |       |       |       |       |  |  |   |  |  |  |   |  |  |  |   |  |  |  |   |  |  |  |   |  |  |  |
| Lipomas                   | -       | -      | -      | -      | -       | -       | -     | -        | -       | -       | -     | -       | -     | -       | -     | -       | -       | -       | -      | -       | -       | -       | -         | -         | -       | -       | -       | -       | -       | -       | -       |       |       |       |       |       |       |       |  |  |   |  |  |  |   |  |  |  |   |  |  |  |   |  |  |  |   |  |  |  |
| Microcephaly              | -       | -      | -      | -      | -       | -       | -     | +        | -       | -       | -     | -       | -     | -       | -     | -       | -       | -       | -      | -       | -       | -       | -         | -         | -       | -       | -       | -       | -       | -       | -       |       |       |       |       |       |       |       |  |  |   |  |  |  |   |  |  |  |   |  |  |  |   |  |  |  |   |  |  |  |
| ON Abnormalities          | -       | -      | -      | -      | +Col    | +Col    | -     | -        | + ONA   | + ONA   | -     | -       | -     | -       | -     | -       | -       | -       | -      | -       | -       | -       | -         | -         | -       | -       | -       | -       | -       | -       | -       |       |       |       |       |       |       |       |  |  |   |  |  |  |   |  |  |  |   |  |  |  |   |  |  |  |   |  |  |  |
| Pituitary Hypoplasia      | -       | -      | -      | -      | +       | +       | -     | -        | -       | -       | -     | -       | -     | -       | -     | -       | -       | -       | -      | -       | -       | -       | -         | -         | -       | -       | -       | -       | -       | -       | -       |       |       |       |       |       |       |       |  |  |   |  |  |  |   |  |  |  |   |  |  |  |   |  |  |  |   |  |  |  |
| Probst Bundle (PB)        | -       | -      | -      | -      | -       | -       | -     | -        | -       | -       | -     | -       | -     | -       | -     | -       | -       | -       | -      | -       | -       | -       | -         | -         | -       | -       | -       | -       | -       | -       | -       |       |       |       |       |       |       |       |  |  |   |  |  |  |   |  |  |  |   |  |  |  |   |  |  |  |   |  |  |  |
| PMG                       | -       | -      | -      | -      | +       | +       | -     | -        | -       | -       | -     | -       | -     | -       | -     | -       | -       | -       | -      | -       | -       | -       | -         | -         | -       | -       | -       | -       | -       | -       | -       |       |       |       |       |       |       |       |  |  |   |  |  |  |   |  |  |  |   |  |  |  |   |  |  |  |   |  |  |  |
| Septum Pellucidum Abnl    | -       | -      | -      | -      | -       | -       | -     | -        | -       | -       | -     | -       | -     | -       | -     | -       | -       | -       | -      | -       | -       | -       | -         | -         | -       | -       | -       | -       | -       | -       | -       |       |       |       |       |       |       |       |  |  |   |  |  |  |   |  |  |  |   |  |  |  |   |  |  |  |   |  |  |  |
| WMD                       | -       | -      | -      | -      | -       | -       | -     | -        | -       | +       | +     | +       | +     | +       | +     | -       | -       | -       | -      | -       | -       | -       | -         | -         | -       | -       | -       | -       | -       | -       | -       |       |       |       |       |       |       |       |  |  |   |  |  |  |   |  |  |  |   |  |  |  |   |  |  |  |   |  |  |  |
| Clinical Findings         |         |        |        |        |         |         |       |          |         |         |       |         |       |         |       |         |         |         |        |         |         |         |           |           |         |         |         |         |         |         |         |       |       |       |       |       |       |       |  |  |   |  |  |  |   |  |  |  |   |  |  |  |   |  |  |  |   |  |  |  |
| CV disease                | -       | -      | -      | -      | -       | -       | -     | -        | -       | -       | -     | -       | -     | -       | -     | -       | -       | -       | -      | -       | -       | -       | -         | -         | -       | -       | -       | -       | -       | -       | -       |       |       |       |       |       |       |       |  |  |   |  |  |  |   |  |  |  |   |  |  |  |   |  |  |  |   |  |  |  |
| Dysmorphic Facies         | +       | +      | +      | +      | -       | -       | -     | +        | -       | +       | +     | -       | -     | -       | -     | -       | -       | -       | -      | -       | -       | -       | -         | -         | -       | -       | -       | -       | -       | -       | -       |       |       |       |       |       |       |       |  |  |   |  |  |  |   |  |  |  |   |  |  |  |   |  |  |  |   |  |  |  |
| Endocrine disease         | -       | -      | -      | -      | +GH Def | +GH Def | -     | -        | -       | -       | -     | -       | -     | -       | -     | -       | -       | -       | -      | -       | -       | -       | -         | -         | -       | -       | -       | -       | -       | -       | -       |       |       |       |       |       |       |       |  |  |   |  |  |  |   |  |  |  |   |  |  |  |   |  |  |  |   |  |  |  |
| Hypotonia/Flacidty        | -       | -      | -      | -      | -       | -       | -     | -        | -       | -       | -     | -       | -     | -       | -     | -       | -       | -       | -      | -       | -       | -       | -         | -         | -       | -       | -       | -       | -       | -       | -       |       |       |       |       |       |       |       |  |  |   |  |  |  |   |  |  |  |   |  |  |  |   |  |  |  |   |  |  |  |
| MR/DD                     | +MLD    | +MLD   | +MLD   | +MLD   | -       | -       | +     | -        | -       | +       | +     | -       | -     | +       | +     | -       | -       | -       | +SEV   | +SEV    | +SEV    | +       | -         | -         | -       | -       | -       | -       | -       | -       | -       |       |       |       |       |       |       |       |  |  |   |  |  |  |   |  |  |  |   |  |  |  |   |  |  |  |   |  |  |  |
| Respiratory abnormalities | -       | -      | -      | -      | +       | -       | -     | +        | -       | -       | -     | -       | -     | -       | -     | -       | -       | -       | -      | -       | -       | -       | -         | -         | -       | -       | -       | -       | -       | -       | -       |       |       |       |       |       |       |       |  |  |   |  |  |  |   |  |  |  |   |  |  |  |   |  |  |  |   |  |  |  |
| Seizures                  | -       | -      | -      | -      | -       | -       | -     | +        | -       | -       | -     | -       | +     | +       | +     | -       | -       | -       | +ABS   | + NCtrl | +ABS    | -       | -         | -         | -       | -       | -       | -       | -       | -       | -       |       |       |       |       |       |       |       |  |  |   |  |  |  |   |  |  |  |   |  |  |  |   |  |  |  |   |  |  |  |
| Skeletal anomalies        | +MED    | +MED   | +MED   | +MED   | -       | -       | -     | -        | -       | -       | -     | -       | -     | -       | -     | -       | -       | -       | -      | -       | -       | -       | -         | -         | -       | -       | -       | -       | -       | -       | -       |       |       |       |       |       |       |       |  |  |   |  |  |  |   |  |  |  |   |  |  |  |   |  |  |  |   |  |  |  |
| SOD                       | -       | -      | -      | -      | +       | +       | -     | -        | -       | -       | -     | -       | -     | -       | -     | -       | -       | -       | -      | -       | -       | -       | -         | -         | -       | -       | -       | -       | -       | -       | -       |       |       |       |       |       |       |       |  |  |   |  |  |  |   |  |  |  |   |  |  |  |   |  |  |  |   |  |  |  |
| Spasticity                | -       | -      | -      | -      | -       | -       | +     | +SEV     | -       | +MOD    | -     | +       | +     | +       | +     | +       | +       | +       | -      | -       | -       | -       | -         | -         | -       | -       | -       | -       | -       | -       | -       |       |       |       |       |       |       |       |  |  |   |  |  |  |   |  |  |  |   |  |  |  |   |  |  |  |   |  |  |  |
| Visual abnormalities      | -       | -      | -      | -      | -       | +       | -     | + CBLND  | -       | -       | -     | -       | -     | -       | -     | -       | -       | -       | -      | -       | -       | -       | +VEP Abnl | +VEP Abnl | -       | -       | -       | -       | -       | -       | -       |       |       |       |       |       |       |       |  |  |   |  |  |  |   |  |  |  |   |  |  |  |   |  |  |  |   |  |  |  |

Legend: CCA types: HwoD=Hypoplasia without dysplasia, APC=Apple Core CC, ANR=Anterior Remnant CC, STR=Stripe CC, KIN=Kinked CC, CAG=Complete absence of CC. Rest of table: ? unknown, + Present, -Absent, +D (decreased size: referring to anterior commissure) +E (enlarged size: referring to anterior commissure), Abnl = Abnormal, ABS = Seizures (Absence type), ASD = Atrial Septal Defect , BPC = Blake's Pouch Cyst, Cb = Cerebellar , CBLND = Cortical Blindness, CC = Corpus Callosum, CCA = Corpus Callosum Abnormality, Col = Optic Colobomas, CSP = Cavum Septum Pellucidum, Ctrl = Controlled (referring to seizures), CV = Cardiovascular, CVH = Cerebellar Vermis Hypoplasia, Def = Deficiency, DD = Developmental Delay, F = Female, GH = Growth Hormone, GMH = Gray Matter Heterotopias, mo = months, M = Male, MED = Multiple Epiphyseal Dysplasia, MLD=Mild, Mos=Months,MR = Mental Retardation, NA= Not applicable, NCtrl = Not Controlled (referring to seizures), ON = Optic Nerve, ONA = Optic Nerve Atrophy, OPCA = Olivo Ponto Cerebellar Atrophy, PanCA= Pan Cerebellar Atrophy (referring to cerebellar atrophy), PB= Probst Bundles, PCH= Ponto-Cerebellar Hypoplasia, PLD=Polydactyly, PMG=Polymicrogyria, PS = Perisylvian, PST= Pulmonary Stenosis (referring to CV problems), Pt=Patient, SEV=Severe, SOD=Septo Optic Dysplasia, VEP= Visual Evoked Potentials , WMD=White Matter Disease, unk=unknown, yrs=years
